# Supplementary material for: Interleukin-17F Has Anti-Tumor Effects in Oral Tongue Cancer
Source: MDPI journal article supplement (doi:10.3390/cancers11050650), 2019-05-11
Supplement: s1 [file s1]

**Supplementary Table 1. Sequences of the used human gene primers.**

| Gene    | Forward                         | Reverse                        |
|---------|---------------------------------|--------------------------------|
| IL-17F  | 5'-CCCTGGAATTACACTGTCACTTGG -3' | 5'-GAAAGAAACAGAGCAGCCTTGGTG-3' |
| IL-17RA | 5'-CTGGTTCATCACGGGCATCTCC-3'    | 5'-GGTGGTCGGCTGAGTAGATGATC-3'  |
| IL-17RC | 5'-CGTCACTGTGGACAAGGTTCTCG-3'   | 5'-TCGTGGAGGCTTTGCTGGGTAG-3'   |
| GAPDH   | 5'-AAGGTCATCCCTGAGCTG-3'        | 5'-TGCTGTAGCCAAATTCGTTG-3'     |

GAPDH: Glyceraldehyde 3-phosphate dehydrogenase; IL-17F: Interleukin-17F; IL-17RA:

Interleukin-17 Receptor A; IL-17RC: Interleukin-17 Receptor C.

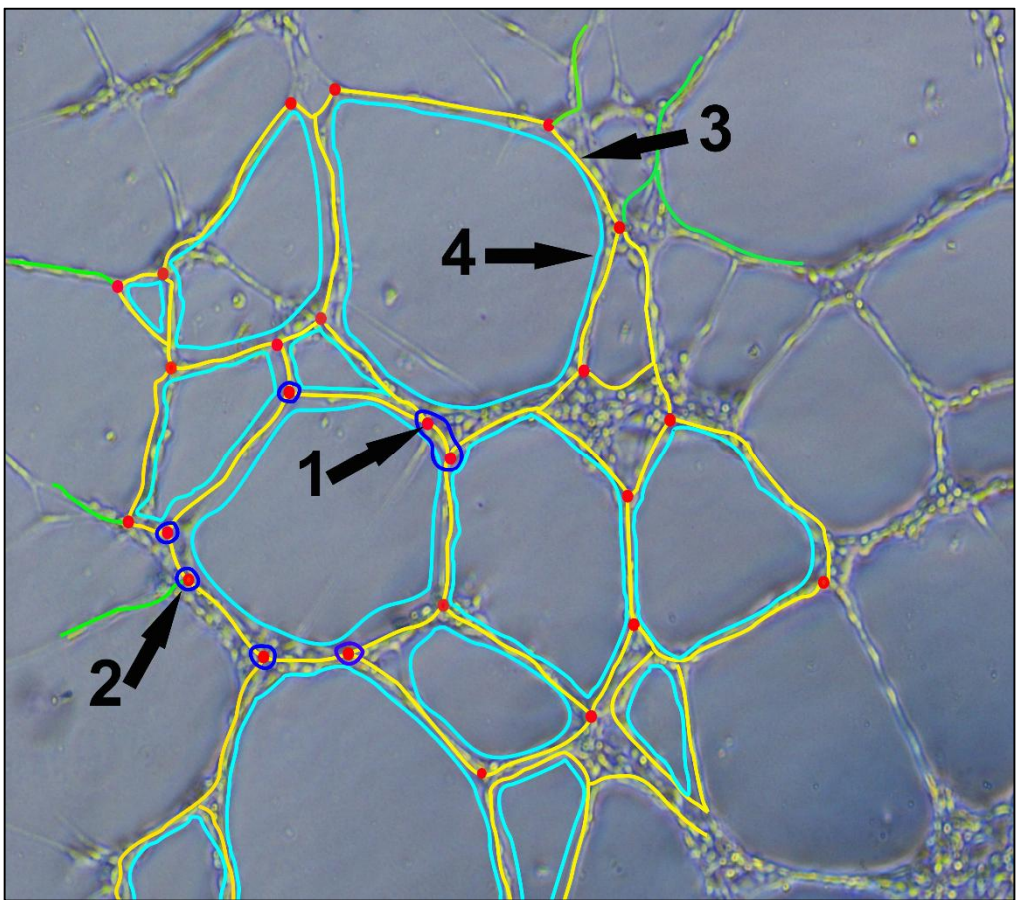

**Supplementary Fig. 1** Morphometric analysis of endothelial tube formation assay. Tubes and vascular pattern were analysed using ImageJ software. The following parameters were used for the quantification of the endothelial tube networks: 1) Nodes represent pixels with 3 neighbours as a circular dot; 2) Junctions correspond to nodes or group of fusing nodes; 3) Segments refer to elements delimited by two junctions; 4) Meshes are areas enclosed by segments or master segments.

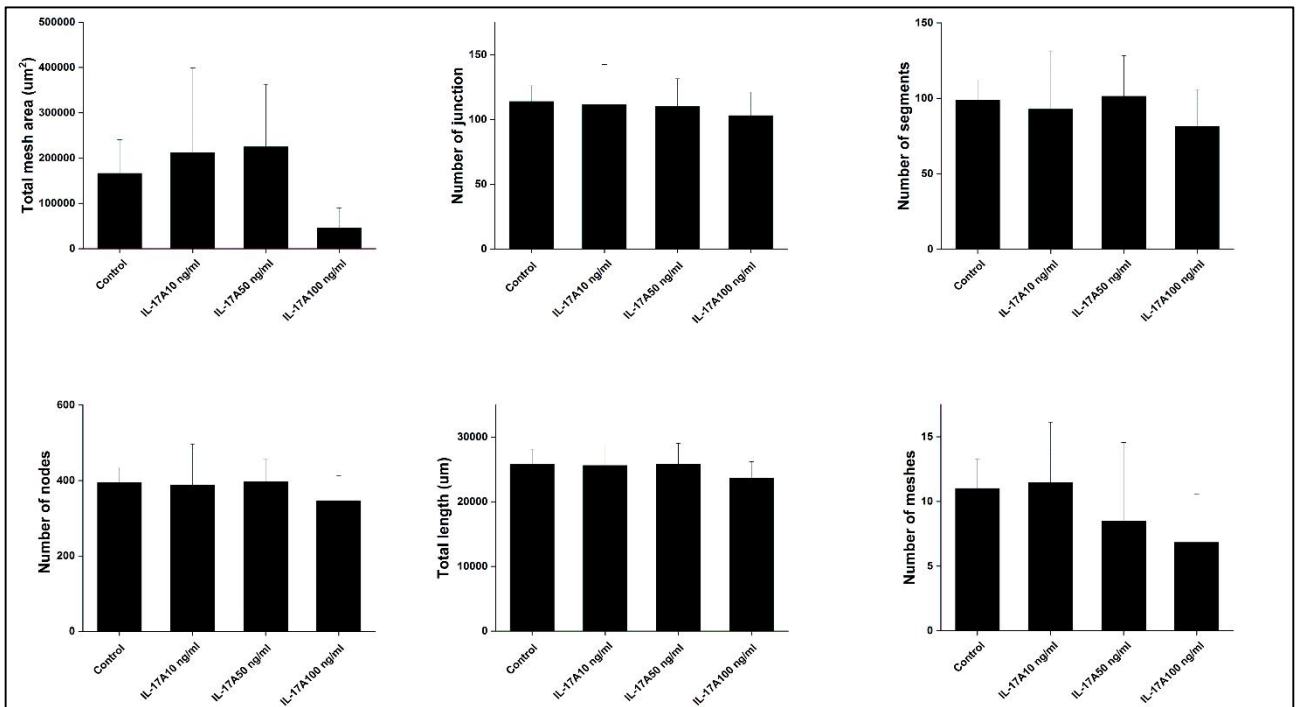

**Supplementary Fig. 2** IL-17A did not show a significant effect on tube-formation parameters of human umbilical vein endothelial cells.

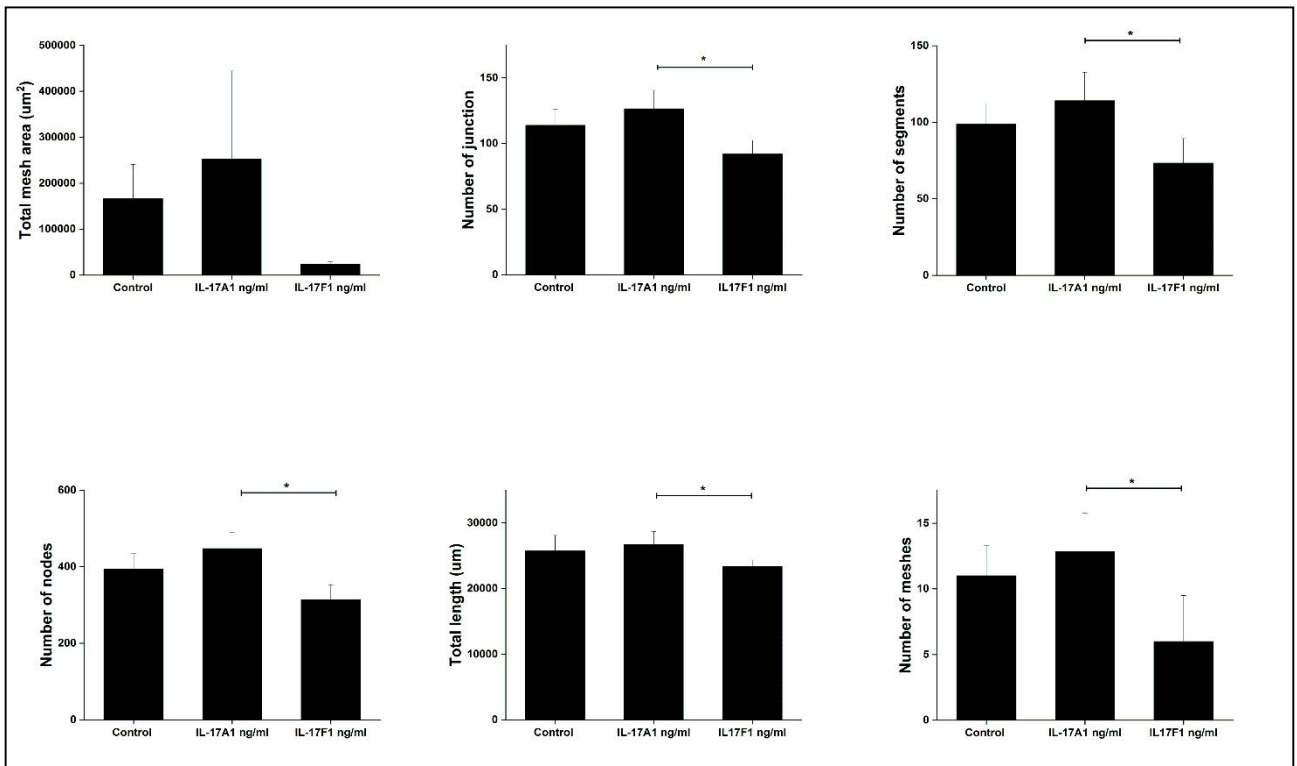

**Supplementary Fig. 3** IL-17F at 1 ng/ml induces the tube-formation parameters of human umbilical vein endothelial cells, while IL-17A, at the same concentration, shows an opposite effect.
